# Supplementary material for: Polybrominated Diphenyl Ether Serum Concentrations and Depressive Symptomatology in Pregnant African American Women
Source: MDPI journal article supplement (doi:10.3390/ijerph18073614), 2021-03-31
Supplement: s1 [file s1]

**Table S1.** Demographic characteristics of an African American cohort 2014-2015 and comparison of subgroups.

| Characteristic n (%)                                                     | Total cohort<br>(n = 487) | Group A<br>(n = 294) | Group B<br>(n = 193) | P value |
|--------------------------------------------------------------------------|---------------------------|----------------------|----------------------|---------|
| <b>Age (<i>M</i> ± <i>SD</i>)</b>                                        | 24.9 ± 4.7                | 25.3 ± 4.9           | 24.2 ± 4.4           | *0.01   |
| <b>Relationship status</b>                                               |                           |                      |                      | 0.1     |
| Not in relationship                                                      | 104 (21.4)                | 69 (23.4)            | 35 (18.1)            |         |
| Relationship, not cohabitating                                           | 148 (30.4)                | 94 (32.0)            | 54 (28.0)            |         |
| Relationship, cohabitating                                               | 233 (47.8)                | 130 (44.2)           | 103 (53.3)           |         |
| <b>Education</b>                                                         |                           |                      |                      | 0.3     |
| 8 <sup>th</sup> grade or less                                            | 1 (0.2)                   | 1 (0.3)              | 0 (0)                |         |
| Some H.S                                                                 | 77 (15.8)                 | 42 (14.3)            | 35 (18.1)            |         |
| Graduated H.S./GED                                                       | 190 (39.0)                | 125 (42.5)           | 65 (33.7)            |         |
| Some college or tech                                                     | 140 (28.7)                | 77 (26.2)            | 63 (32.6)            |         |
| Graduated college                                                        | 50 (10.3)                 | 30 (10.2)            | 20 (10.4)            |         |
| Graduate school or degree                                                | 29 (6.0)                  | 19 (6.5)             | 10 (5.2)             |         |
| <b>Parity</b>                                                            |                           |                      |                      | 0.2     |
| 0                                                                        | 240 (49.3)                | 140 (47.6)           | 100 (51.8)           |         |
| 1                                                                        | 140 (28.7)                | 82 (27.9)            | 58 (30.0)            |         |
| 2+                                                                       | 107 (22.0)                | 72 (24.5)            | 35 (18.1)            |         |
| <b>Insurance</b>                                                         |                           |                      |                      | 0.06    |
| Medicaid                                                                 | 382 (78.4)                | 234 (79.6)           | 148 (76.7)           |         |
| LIM<100%                                                                 | 180 (46.9)                | 84 (35.9)            | 96 (64.9)            |         |
| RSM≤ 200%                                                                | 202 (52.9)                | 150 (64.1)           | 52 (35.1)            |         |
| Private                                                                  | 105 (21.6)                | 60 (20.4)            | 45 (23.3)            |         |
| <b>Body mass index</b>                                                   |                           |                      |                      | 0.8     |
| Underweight (<18.5)                                                      | 18 (3.7)                  | 10 (3.4)             | 8 (4.2)              |         |
| Normal (18.5 – < 25)                                                     | 192 (39.4)                | 112 (38.1)           | 80 (41.5)            |         |
| Overweight (25 – < 30)                                                   | 102 (20.9)                | 63 (21.4)            | 39 (20.2)            |         |
| Obese (≥ 30)                                                             | 175 (35.9)                | 109 (37.1)           | 66 (34.2)            |         |
| <b>Edinburgh Depression Scale<br/>Total Score (<i>M</i> ± <i>SD</i>)</b> | 7.2 ± 5.2                 | 7.5 ± 5.6            | 6.8 ± 5.2            | 0.2     |
| <b>Drinks alcohol in first trimester</b>                                 | 27 (5.7)                  | 19 (6.9)             | 8 (4.2)              | 0.2     |
| <b>Smoked tobacco ever</b>                                               | 67 (14.1)                 | 46 (16.4)            | 21 (10.9)            | 0.09    |
| <b>Smoked MJ in first trimester</b>                                      | 104 (22.1)                | 71 (25.5)            | 33 (17.3)            | *0.04   |

\*Age and smoked marijuana in first trimester means of group A and group B are statistically significant ( $p \leq 0.05$ ).  
Equal variances are assumed.

**Table S2.** Limits of detection (LOD)  
obtained with GC-MS for PBDE  
concentrations (pg/mL).

| Metabolite | LOD   |
|------------|-------|
| PBDE 47    | 3.13  |
| PBDE 85    | 78.13 |
| PBDE 99    | 7.81  |
| PBDE 100   | 3.13  |
| PBDE153    | 78.13 |
| PBDE 154   | 78.13 |

**Table S3.** Comparison of depressive symptoms among African American women at 8-14 weeks and 24-30 s weeks gestation.

| Time point  | N   | EDS Score<br>mean $\pm$ SD | High risk of depression<br>n (%) | Difference in Mean<br>P Value |
|-------------|-----|----------------------------|----------------------------------|-------------------------------|
| 8-14 weeks  | 193 | 6.82 $\pm$ 5.24            | 52 (27)                          | 0.28                          |
| 24-30 weeks | 160 | 6.20 $\pm$ 5.52            | 39 (20)                          |                               |

EDS = Edinburgh Depression Scale

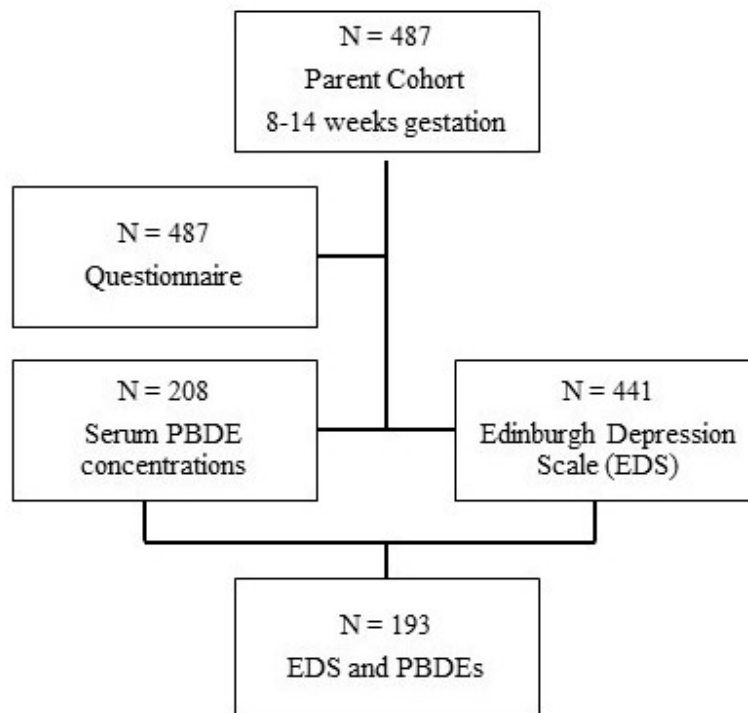

Figure S1. Flow diagram of study selection (N = 193) from parent cohort sample.
